# Supplementary material for: Neural responses to others’ pain vary with psychopathic traits in healthy adult males
Source: Cogn Affect Behav Neurosci. 2015 Mar 17;15(3):578–88. doi: 10.3758/s13415-015-0346-7 (PMC4526584; doi:10.3758/s13415-015-0346-7)
Supplement: Supplementary file 1 — (PDF 28 kb) [file 13415_2015_346_MOESM1_ESM.pdf]

**Table S1. Whole brain analyses showing main-effects across all participants for No-Pain> Pain BOLD response**

| Brain regions          | Peak |     |     |     |      |      | Cluster    |         |
|------------------------|------|-----|-----|-----|------|------|------------|---------|
|                        | L/R  | x   | y   | z   | t    | Z    | Extent (k) | P (FWE) |
| Calcarine sulcus       | L    | -8  | -88 | 12  | 5.42 | 4.73 | 1416       | <.001   |
| White matter           | R    | 28  | -48 | 14  | 5.20 | 4.58 | 73         | .39     |
| Superior frontal gyrus | R    | 18  | 58  | 2   | 4.57 | 4.12 | 363        | <.001   |
| White matter           | L    | -30 | -44 | 0   | 4.42 | 4.00 | 21         | .92     |
| Superior frontal gyrus | L    | -14 | 50  | -10 | 3.91 | 3.61 | 36         | .77     |
| Caudate nucleus        | L    | -18 | 24  | 4   | 3.96 | 3.65 | 12         | .98     |
| Superior frontal gyrus | R    | 24  | -44 | -34 | 3.96 | 3.65 | 15         | .96     |
| Supramarginal gyrus    | R    | 44  | -52 | 34  | 3.84 | 3.55 | 24         | .90     |
| White matter           | L    | -24 | 38  | 10  | 3.59 | 3.35 | 16         | .96     |

**Notes:** Whole-brain analyses reported at a threshold level of  $P < .001$  (uncorrected, cluster size > 10 voxels). Spatial coordinates (x, y, z) are in Montreal Neurological Institute space. R = Right; L = Left.
